# Supplementary material for: Zeaxanthin epoxidase 3 Knockout Mutants of the Model Diatom Phaeodactylum tricornutum Enable Commercial Production of the Bioactive Carotenoid Diatoxanthin
Source: Mar Drugs. 2024 Apr 19;22(4):185. doi: 10.3390/md22040185 (PMC11051370; doi:10.3390/md22040185)
Supplement: Supplementary file 1 [file marinedrugs-22-00185-s001.zip › Supplementary file S1_ZEPs Accession number and distribution.xlsx]

## Sheet: ZEPs Accessions
Accession numbers are from the NCBI database and The Marine Microbial Eukaryote Transcriptome database
Species	Accession numbers
Phaeodactylum tricornutum ZEP3	XP_002178367.1
Amphora coffeiformis ZEP3	CAE0413728.1
Mayamaea pseudoterrestris ZEP3	GKY94469.1
Seminavis robusta ZEP3	CAB9514622.1
Pseudo-nitzschia australis ZEP3	CAE0713105.1
Proboscia alata ZEP3	CAF5993277.1
Fragilariopsis cylindrus CCMP1102 ZEP3	OEU23733.1
Nitzschia inconspicua ZEP3	KAG7366110.1
Thalassiothrix antarctica L6 D1 ZEP3	CAMNT_0038828503
Corethron hystrix ZEP3	CAD8876784.1
Ditylum brightwellii ZEP3	CAE4873224.1
Leptocylindrus danicus ZEP3	CAE3769836.1
Skeletonema marinoi SM1012Den-03 ZEP3	CAMNT_0003418577
Thalassiosira punctigera Tpunct2005C2 ZEP3	CAMNT_0013344005
Thalassiosira rotula CCMP3096 ZEP3	CAMNT_0027257977
Chaetoceros tenuissimus ZEP3	GFH53910.1
Triparma strigata ZEP3	GMH75823.1
Triparma columacea	GMI43630.1
Uncultured Bolidomonas ZEP3	CAH7646915.1
Pelagomonas calceolata ZEP3	CAE0686339.1
Aureococcus anophagefferens ZEP3	XP_009037524.1
Chrysophaeum taylorii ZEP3-like	KAJ8603474.1
Pseudopedinella elastica ZEP3	CAF6515942.1
Florenciella parvula CCMP2471 ZEP3	CAMNT_0007499687
Scrippsiella trochoidea ZEP3	AMV91974.1
Peridinium aciculiferum PAER-2	CAMNT_0025599169
Ceratium fusus PA161109	CAMNT_0013618463
Phaeocystis antarctica ZEP3	CAF5802971.1
Calcidiscus leptoporus ZEP3	CAD8534815.1
Chrysotila carterae ZEP3	CAE0772485.1
Pinguiococcus pyrenoidosus CCMP2078 ZEP3	CAMNT_0042902141
Emiliania huxleyi PLY M219 ZEP3	CAMNT_0024137339
Isochrysis galbana CCMP1323 ZEP3	CAMNT_0021653189
Karlodinium micrum CCMP2283 ZEP3	CAMNT_0009327617
Karenia brevis CCMP2229 ZEP3	MMETSP0027-31-137177
Pleurochrysis carterae CCMP645	CAMNT_0010136079
TARA Coccolithales ZEP2-3	MATOU-v1_1063416
Guillardia theta CCMP2712 ZEP	XP_005836989.1
Cryptophyta sp. CCMP2293	KAJ1480417.1
Rhodomonas lens RHODO	CAMNT_0019218567
Hemiselmis andersenii CCMP1180	CAMNT_0009551071
Ochromonas sp. CCMP1393 ZEP2-3	CAF9245822.1
Chrysophyte sp. CCMP2298	CAMNT_0014197821
Epipyxis sp. PR26KG	HAGF01040803.1
Polarella glacialis ZEP3	CAK0878647.1
Chattonella subsalsa ZEP	CAE4891238.1
Heterosigma akashiwo ZEP	CAE5479649.1
Vaucheria litorea ZEP	CAE8361342.1
Tribonema minus ZEP	KAG5182534.1
Ectocarpus siliculosus ZEP	CBJ27312.1
Polarella glacialis ZEP2-3	CAE8665021.1
Alexandrium monilatum CCMP3105	CAMNT_0017113923
Gambierdiscus australes CAWD149	CAMNT_0011539369
Phaeodactylum tricornutum ZEP2	XP_002176935.1
Seminavis robusta ZEP2	CAB9496739.1
Fistulifera solaris ZEP2	GAX28461.1
Fragilariopsis cylindrus CCMP1102 ZEP2	OEU16607.1
Minutocellus polymorphus ZEP2	CAE1724750.1
Eucampia antarctica ZEP2	CAD9676530.1
Rhizosolenia setigera CCMP1694 ZEP2	CAMNT_0020640947
Leptocylindrus danicus ZEP2	CAE3769596.1
Chaetoceros tenuissimus ZEP2	GFH51019.1
Thalassiosira minuscula ZEP2	CAE8304034.1
Thalassiosira rotula CCMP3096 ZEP2	CAMNT_0027258687
Nitzschia inconspicua ZEP2	KAG7342458.1
Skeletonema marinoi ZEP2	CAE4026396.1
Triparma strigata ZEP2	GMI01839.1
Triparma verrucosa ZEP2	GMI11706.1
Tetraparma gracilis ZEP2	GMI41907.1
Bolidomonas pacifica CCMP1866 ZEP2	CAMNT_0006543089
Pelagomonas calceolata ZEP2	CAE0702546.1
Pelagococcus subviridis CCMP1429 ZEP2	CAMNT_0040831901
Aureococcus anophagefferens CCMP1850 ZEP2	CAMNT_0008935553
Pinguiococcus pyrenoidosus CCMP2078 ZEP2	CAMNT_0042896275
Florenciella parvula CCMP2471 ZEP2	CAMNT_0007500723
Emiliania huxleyi CCMP1516 ZEP2	XP_005783385.1
Isochrysis galbana CCMP1323 ZEP2	CAMNT_0021652335
Chrysochromulina rotalis UIO044 ZEP2	CAMNT_0003308031
Diacronema lutheri ZEP2	KAG8463408.1
Chrysoculter rhomboideus RCC1486 ZEP2	CAMNT_0007443621
Pseudopedinella elastica CCMP716 ZEP2	CAMNT_0013460841
Scrippsiella trochoidea CCMP3099 ZEP2	CAMNT_0002734343
Ceratium fusus PA161109 ZEP2	CAMNT_0013585639
Polarella glacialis CCMP1383 ZEP2	CAMNT_0002474189
Karlodinium micrum CCMP2283 ZEP2	CAMNT_0009296969
Karenia brevis CCMP2229 ZEP2	MMETSP0027-31-122315
Effrenium voratum ZEP2	CAJ1425335.1
Phaeodactylum tricornutum ZEP1	XP_002180238.1
Fragilaria radians ZEP1	MOB03974.1
Mayamaea pseudoterrestris ZEP1	GKZ00834.1
Seminavis robusta ZEP1	CAB9512158.1
Fistulifera solaris ZEP1	GAX15981.1
Eucampia antarctica ZEP1	CAD9699245.1
Leptocylindrus danicus ZEP1	CAD9569928.1
Chaetoceros debilis ZEP1	CAE0474501.1
Rhizosolenia setigera CCMP1694 ZEP1	CAMNT_0020656091
Triparma strigata ZEP1	GMH80917.1
Triparma pacifica ZEP1	CAE1777799.1
Fragilariopsis cylindrus CCMP1102 ZEP1	OEU18170.1
Nitzschia inconspicua ZEP1	KAG7373238.1
Thalassiosira pseudonana CCMP1335 ZEP1	XP_002291549.1
Skeletonema marinoi ZEP1	CAE0986378.1
Pelagomonas calceolata RCC969 ZEP1	CAMNT_0007234655
Aureococcus anophagefferens CCMP1850 ZEP1	CAMNT_0008945139
Chrysocystis fragilis CCMP3189 ZEP1	CAMNT_0042913919
Chrysoreinhardia sp CCMP2950 ZEP1	CAMNT_0028379449
Florenciella parvula ZEP1	CAE4265040.1
Chrysochromulina polylepis CCMP1757 ZEP1	CAMNT_0025153057
Pleurochrysis carterae CCMP645 ZEP1	CAMNT_0010111015
Isochrysis galbana ZEP1	CAE5823653.1
Emiliania huxleyi CCMP1516	XP_005790220.1
Diacronema lutheri ZEP1	CAD8269262.1
Pseudopedinella elastica ZEP1	CAF6515941.1
Karlodinium micrum CCMP2283 ZEP1	CAMNT_0009322843
Karenia brevis CCMP2229 ZEP1	MMETSP0027-31-121266
Thalassiosira rotula ZEP4	CAE8577802.1
Thalassiosira pacifica strain CCMP989 ZEP4	GJXL01035323.1,
Extubocellulus spinifer ZEP4	CAMNT_0020156147
Odontella aurita isolate 1302-5 ZEP4	CAMNT_0000429523
Chaetoceros tenuissimus ZEP4	GFH51727.1
Rhizosolenia setigera CCMP1694 ZEP4	CAMNT_0020666409
Bellerochea sp. AJA141-15	GJWO01014977.1
Eunotogramma lunatum ECT2AJA-043	GJXO01018391.1
Amphora coffeaeformis CCMP127 ZEP4	CAMNT_0011036679
Seminavis robusta ZEP4	CAB9498837.1
Madagascaria erythrocladioides	ATG80391.1
Lithophyllum sp. ZEP-like	GHIV01137154.1
Vitrella brassicaformis CCMP3155 ZEP-like	CEL99596.1
Diacronema lutheri Zep-like	CAD8269263.1
Chromera velia ZEP-like	CAE2630114.1
Nannochloropsis gaditana ZEP-like	EWM27076.1
Synchroma pusillum Zep-like	CAE3898733.1
Karlodinium veneficum ZEP-like	ARG42304.1
Karenia brevis CCMP2229 ZEP-like	MMETSP0027-31-131023
Chrysochromulina rotalis UIO044 ZEP-like	CAMNT_0003300313
Isochrysis galbana ZEP-like	CAE5840795.1
Emiliania huxleyi CCMP379 ZEP-like	CAMNT_0041735875
Calcidiscus leptoporus ZEP-like	CAD8536158.1
Phaeocystis antarctica ZEP-like	CAD8509876.1
Bigelowiella longifila CCMP242 ZEP-like	CAMNT_0027851315
Bigelowiella natans CCMP1259 ZEP-like	CAMNT_0009732069
Chlorarachnion reptans CCCM449 ZEP-like	CAMNT_0001687063
Partenskyella glossopodia RCC365 ZEP-like	CAMNT_0043078021
Ostreococcus tauri ZEP	CEG00292.1
Auxenochlorella protothecoides ZEP	JAT71535.1
Chlamydomonas sp. W80 ZEP	AAO48941.1
Marchantia polymorpha subsp. ruderalis ZEP	OAE22428.1
Solanum lycopersicum ZEP	NP_001296233.1
Arabidopsis thaliana ZEP/ABA1	NP_851285.1
Phaeodactylum tricornutum Phatr3_J43425	XP_002177614.1|
Amphora coffeiformis FADbp	CAE0409114.1
Nitzschia inconspicua FADbp	KAG7355917.1
Skeletonema marinoi FADbp	CAE4020810.1
Thalassiosira oceanica FADbp	EJK72990.1
Ectocarpus siliculosus FADbp	CBN75031.1
Tetraselmis sp. GSL018	JAC81748.1
Gracilariopsis chorda FADbp	PXF41829.1
Porphyridium purpureum FADbp	KAA8498770.1
WoRMS taxon format
Species	Phylum	Class	Order	Family / genus	ZEP1	ZEP2	ZEP3	ZEP2-3 like	ZEP-like	ZEP4
Phaeodactylum tricornutum	Bacillariophyta	Bacillariophyceae	Naviculales	Phaeodactylaceae	clade II	X	X
Fistulifera solaris	Bacillariophyta	Bacillariophyceae	Naviculales	Naviculaceae	clade II	X	X
Seminavis robusta	Bacillariophyta	Bacillariophyceae	Naviculales	Naviculaceae	clade II	X	X
Fragilariopsis cylindrus	Bacillariophyta	Bacillariophyceae	Bacillariales	Bacillariaceae	clade I	X	X
Nitzschia inconspicua	Bacillariophyta	Bacillariophyceae	Bacillariales	Bacillariaceae	clade I	X	X
Eucampia antarctica	Bacillariophyta	Bacillariophyceae	Hemiaulales	Hemiaulaceae	clade II	X	X
Leptocylindrus danicus	Bacillariophyta	Bacillariophyceae	Leptocylindrales	Leptocylindraceae	clade II	X	X
Chaetoceros tenuissimus	Bacillariophyta	Bacillariophyceae	Chaetocerotanae	Chaetocerotaceae	clade II	X	X			X
Rhizosolenia setigera	Bacillariophyta	Bacillariophyceae	Rhizosoleniales	Rhizosoleniaceae	clade II	X				X
Thalassiosira pseudonana	Bacillariophyta	Bacillariophyceae	Thalassiosirales	Thalassiosiraceae	clade I	X	X
Skeletonema marinoi	Bacillariophyta	Bacillariophyceae	Thalassiosirales	Skeletonemaceae	clade I	X	X
Triparma strigata	Ochrophyta	Bolidophyceae	Parmales	Triparmaceae	clade II	X	X
Pelagomonas calceolata	Ochrophyta	Pelagophyceae	Pelagomonadales	Pelagomonadaceae	clade I	X	X
Aureococcus anophagefferens	Ochrophyta	Pelagophyceae	Pelagomonadales	Pelagomonadaceae	clade I	X	X
Florenciella parvula	Ochrophyta	Dictyochophyceae	Florenciellales	Florenciella	clade I	X	X
Pseudopedinella elastica	Ochrophyta	Dictyochophyceae	Pedinellales	Actinomonadaceae	clade I	X	X
Pinguiococcus pyrenoidosus	Ochrophyta	Pinguiophyceae	Pinguiochrysidales	Pinguiochrysidaceae		X	X
Ochromonas sp. CCMP1393	Ochrophyta	Chrysophyceae	Chromulinales	Chromulinaceae				X
Ectocarpus siliculosus	Ochrophyta	Phaeophyceae	Ectocarpales	Ectocarpaceae				X
Vaucheria litorea	Ochrophyta	Xanthophyceae	Vaucheriales	Vaucheriaceae				X
Chattonella subsalsa	Ochrophyta	Raphidophyceae	Chattonellales	Chattonellaceae				X
Nannochloropsis gaditana	Ochrophyta	Eustigmatophyceae	Eustigmatales	Monodopsidaceae					X
Emiliania huxleyi	Haptophyta	Coccolithophyceae	Isochrysidales	Noelaerhabdaceae	clade I	X	X		X
Isochrysis galbana	Haptophyta	Coccolithophyceae	Isochrysidales	Isochrysidaceae	clade I	X	X		X
Karlodinium micrum	Myzozoa	Dinophyceae	Gymnodiniales	Kareniaceae	clade I	X	X		X
Karenia brevis	Myzozoa	Dinophyceae	Gymnodiniales	Kareniaceae	clade I	X	X		X
Scrippsiella trochoidea	Myzozoa	Dinophyceae	Thoracosphaerales	Thoracosphaeraceae		X	X
Polarella glacialis	Myzozoa	Dinophyceae	Suessiales	Suessiaceae		X		X
Effrenium voratum	Myzozoa	Dinophyceae	Suessiales	Symbiodiniaceae		X
Vitrella brassicaformis	Myzozoa	Chromeridophyceae	Colpodellales	Vitrellaceae					X
Guillardia theta	Cryptophyta	Cryptophyceae	Pyrenomonadales	Geminigeraceae				X
Rhodomonas lens	Cryptophyta	Cryptophyceae	Pyrenomonadales	Pyrenomonadaceae				X
Bigelowiella natans	Chlorarachniophyta	Chlorarachniophyceae	Chlorarachniales	Kareniaceae					X
Madagascaria erythrocladioides	Rhodophyta	Compsopogonophyceae	Erythropeltidales	Madagascaria					X
	Red color indicate that the genes are missing from genomes or transcriptome assemblies
